# Supplementary material for: Improved reannotations of Aegilops umbellulata (PI 554389) genome and transcriptomics data provides candidates for leaf rust resistance for wheat improvement
Source: Research Square preprint supplement (doi:10.21203/rs.3.rs-7539367/v1), 2025-10-01
Supplement: Supplementary file 3 [file f4cc2b01ad321540320060f8.xlsx]

## Sheet: Table S1
Table S1: Distribution of genes and transcripts of all gene models, high confidence (HC) gene models, low confidence (LC) gene models, and resistance gene analogs (RGAs) on each chromosome of Ae. umbellulata acc. PI 554389 reference genome.
	Number of genes	Number of transcripts	Number of HC genes	Number of HC transcripts	Number of LC genes	Number of LC transcripts	Number of RGAs genes	Number of RGAs transcripts
Chr1U	6050	6817	4084	4675	2014	2142	210	233
Chr2U	9106	10265	6281	7165	2894	3100	320	384
Chr3U	7647	8655	5085	5847	2612	2808	224	262
Chr4U	10319	11517	6677	7562	3720	3955	344	390
Chr5U	9627	10854	6588	7519	3117	3335	228	275
Chr6U	8290	9445	5677	6557	2663	2888	219	245
Chr7U	10750	12166	7029	8074	3805	4092	410	504
ChrUn	645	714	485	533	167	181	11	17
Total	62434	70433	41906	47932	20992	22501	1966	2310

## Sheet: Table S2
Table S2: Distribution of Monoexonic and multiexonic genes in all genes, high confidence genes and low confidence genes of Aegilops umbellulata acc. PI 554389 v2 annotations.
	All genes		HC genes		LC genes
	Monoexonic genes	Multiexonic genes	Monoexonic genes	Multiexonic genes	Monoexonic genes	Multiexonic genes
Chr1U	2316	3734	1188	2896	1177	837
Chr2U	3496	5610	1900	4381	1657	1237
Chr3U	3113	4534	1594	3491	1565	1047
Chr4U	4513	5806	2388	4289	2208	1512
Chr5U	3769	5858	2049	4539	1793	1324
Chr6U	3148	5142	1672	4005	1520	1143
Chr7U	4427	6323	2284	4745	2206	1599
ChrUn	300	345	202	283	104	63
Total	25082	37352	13277	28629	12230	8762

## Sheet: Table S3
Table S3: Average and maximum number of genes and resistance gene analogs (RGAs) per Mb (megabase) in Aegilops umbellulata acc. PI 554389 v2 annotations.
	Chromosome size (Mb)	Average number of genes per Mb	Maximum number of genes per Mb	Average number of RGAs per Mb	Maximum number of RGAs per Mb
Chr1U	488.846	12.3761	81	0.429583	22
Chr2U	643.128	14.1589	67	0.497568	9
Chr3U	567.823	13.4672	74	0.394489	21
Chr4U	552.526	18.6761	75	0.622595	12
Chr5U	634.187	15.1801	71	0.359515	7
Chr6U	658.841	12.5827	81	0.332402	12
Chr7U	655.003	16.4121	85	0.625951	14

## Sheet: Table S4
Table S4: Overview of resistance gene analogs (RGAs) predicted in Aegilops umbellulata acc. PI 554389 v2.
Type of RGAs	Number of RGAs	In percentage
NBS	107	0.0463203
CNL	327	0.141558
TNL	0	-
CN	108	0.0467532
TN	3	0.0012987
NL	281	0.121645
TX	1	0.0004329
RNL	1	0.0004329
RN	2	0.000865801
Others	0	-
RLP	140	0.0606061
RLK	1185	0.512987
TM-CC	153	0.0662338
RPW8	2	0.000865801
Total	2310
NBS: Nucleotide-binding site; CNL: CC-NBS-LRR; TNL: TIR-NBS-LRR; CN: CC-NBS; TN: TIR-NBS; NL: NBS-LRR; TX: TIR-unknown domain.; RNL: RPW8-NBS-LRR; RN: RPW8-NBS; RLP: Receptor like protein; RLK: Receptor like kinase; TM-CC: Transmembrane-coiled-coil; RPW8: Resistance to powdery mildew 8

## Sheet: Table S5
Table S5: Comparison of resistance gene analogs (RGSs) from current study with Aegilops tauschii and Triticum aestivum.
	NBS	CNL	TNL	CN	TN	NL	RLP	RLK	TM-CC	Total	Taken from publication
Ae. umbellulata	107	327	0	108	3	281	140	1185	153	2304	Curent publication
Ae. tauschii	119	215	0	85	3	221	145	991	142	1921	Wang et. al., 2021
T. aestivum	145	235	0	105	4	280	206	1094	174	2243	Wang et. al., 2021

## Sheet: Table S6
Table S6: Naming convention used to generate and analysis RNAseq data.
Code	Meaning of the letter or digit(s)
U	Aegilops umbellulata
89	Resistant accession PI 554389
17	Susceptible accession PI 554417
I	Inoculted with rust
M	Mock (0nly soltrol oil)
0	Sample taken at zero time point
6	Sample taken 6 hours after treatment
24	Sample taken 24 hours after treatment
72	Sample taken 72 hours after treatment
R1	Replication 1
R2	Replication 2
R3	Replication 3

## Sheet: Table S7
Table S7: Mapping statistics of RNAseq data of two contrasting accessions mapped to Aegilops umbellulata acc. PI 554389 reference genome.
Sample name	Total reads	Total Clean reads	Uniquely mapped reads	Multi-mapped reads	Unmapped reads
U890	27007206	26758694	24169795	985714	1603185
U89I6	27073820	2.68097e+07	2.44621e+07	983087	1.36449e+06
U89I24	2.43574e+07	2.41015e+07	2.17681e+07	968491	1364877
U89I72	3.13331e+07	31019063	2.83137e+07	1.05953e+06	1.64581e+06
U89M6	2.69452e+07	2.66243e+07	2.42502e+07	951351	1.42268e+06
U89M24	2.40342e+07	2.37965e+07	2.14332e+07	953570	1.40966e+06
U89M72	24843041	2.46041e+07	2.17829e+07	1.08108e+06	1.74008e+06
U170	25206597	2.49686e+07	1.99155e+07	1837748	3215334
U17I6	2.3434e+07	2.32204e+07	1.82548e+07	1855248	3.1103e+06
U17I24	29404131	29146485	22902341	2.24077e+06	4.00338e+06
U17I72	3.32956e+07	3.29861e+07	2.61948e+07	2600997	4190373
U17M6	2.49445e+07	24709234	1.96769e+07	1.86048e+06	3.17189e+06
U17M24	25866624	2.56373e+07	19984431	2.0798e+06	3.57305e+06
U17M72	3.01062e+07	29852638	2.37307e+07	2.33203e+06	3.78989e+06

## Sheet: Table S8
Table S8: Details about the comparisons tested for differential gene expression in this study.
Resistant vs Susceptible	Explanation
U890 vs U170	R vs S at zero time point
U89I6 vs U17I6	R vs S inoculated at 6 hours after inoculation (HAI)
U89I24 vs U17I24	R vs S inoculated at 24 HAI
U89I72 vs U17I72	R vs S inoculated at 72 HAI
U89M6 vs U17M6	R vs S mock at 6 HAI
U89M24 vs U17M24	R vs S mock at 24 HAI
U89M72 vs U17M72	R vs S mock at 72 HAI
Treatment vs Mock	Explanation
U89I6 vs U89M6	Resistant at 6 HAI
U89I24 vs U89M24	Resistant at 24 HAI
U89I72 vs U89M72	Resistant at 72 HAI
U17I6 vs U17M6	Susceptible at 6 HAI
U17I24 vs U17M24	Susceptible at 24 HAI
U17I72 vs U17M72	Susceptible at 72 HAI

## Sheet: Table S9
Table S9: Overview of differentially expression genes (DEGs) between different comparisons at padj < 0.05.
Comparison Name	Total DEGs	Up-regulated genes	Down-regulated genes
U890 vs U170	11203	6422	4781
U89I6 vs U17I6	14564	7485	7079
U89I24 vs U17I24	15074	8258	6816
U89I72 vs U17I72	14939	8366	6573
U89M6 vs U17M6	14910	8032	6878
U89M24 vs U17M24	15449	8462	6987
U89M72 vs U17M72	14618	8051	6567
U89I6 vs U89M6	36	9	27
U89I24 vs U89M24	22	15	7
U89I72 vs U89M72	194	21	173
U17I6 vs U17M6	16	14	2
U17I24 vs U17M24	66	49	17
U17I72 vs U17M72	939	248	691

## Sheet: Table S10
Table S10: Primers used in this study to validate DEGs using qRT-PCR.
Prime name	Gene name	Sequences
AuLRG1_F	AeUmb.PI554389.v2.1U.G0469500	AACTGGAGCCGTCTGAATTG
AuLRG1_R	AeUmb.PI554389.v2.1U.G0469500	CATCATCTGCCTGTTCCTTCTC
AuLRG2_F	AeUmb.PI554389.v2.2U.G0894700	ATCGTCGGTAAGGAGGGTT
AuLRG2_R	AeUmb.PI554389.v2.2U.G0894700	GAGGAACACAGCATAGGCATAG
AuLRG3_F	AeUmb.PI554389.v2.3U.G0248400	GGTGATGAACACGATCGGAAT
AuLRG3_R	AeUmb.PI554389.v2.3U.G0248400	GTACGTGCTGGTGTCCTTG
AuLRG4_F	AeUmb.PI554389.v2.4U.G0078700	CGCTGGAGGAAAGGTGATAAT
AuLRG4_R	AeUmb.PI554389.v2.4U.G0078700	CTCGATCCCATCCATACACATC
AuLRG5_F	AeUmb.PI554389.v2.4U.G0263400	TCCTTCAACGCCACATTCA
AuLRG5_R	AeUmb.PI554389.v2.4U.G0263400	GAGGCAGTATCCCGAACATAAG
AuLRG7_F	AeUmb.PI554389.v2.5U.G0005300	GGACGATGAGGATGATGATGAG
AuLRG7_R	AeUmb.PI554389.v2.5U.G0005300	TTCCTTGGTCTTGAGCTTGG
AuLRG8_F	AeUmb.PI554389.v2.5U.G0322400	CGGACGACAAGGACTACAAG
AuLRG8_R	AeUmb.PI554389.v2.5U.G0322400	CTGATGTACAGGAACAGGAAGG
AuLRG10_F	AeUmb.PI554389.v2.7U.G0170300	GGGAGATCAAGATGATGCCTTTC
AuLRG10_R	AeUmb.PI554389.v2.7U.G0170300	ACCATTCTCGCCAGGAAGTA
AuGAPDH_F	AeUmb.PI554389.v2.6U.G0465200	GTGTTCCCACTGTTGATGTTTC
AuGAPDH_R	AeUmb.PI554389.v2.6U.G0465200	CCTCCTTGATAGCAGCCTTAAT

[truncated: 1 more sheets: Table S11]
